# Supplementary material for: Surface-initiated atom transfer radical polymerization grafting from nanoporous cellulose gels to create hydrophobic nanocomposites
Source: Royal Society of Chemistry journal article supplement (doi:10.1039/c8ra04163f), 2018-01-01
Supplement: c8ra04163f1.pdf [file c8ra04163f1.pdf]

**Supporting Information**

**Surface-Initiated Atom Transfer Radical Polymerization Grafting  
from Nanoporous Cellulose Gels to Create Hydrophobic  
Nanocomposites**

Dan Cheng<sup>a</sup>, Pingdong Wei<sup>a</sup>, Lina Zhang<sup>a</sup>, Jie Cai<sup>a,b\*</sup>

<sup>a</sup>*College of Chemistry and Molecular Sciences, Wuhan University,*

*Wuhan 430072, China*

<sup>b</sup>*Research Institute of Shenzhen, Wuhan University, Shenzhen 518057, China*

\*E-mail: [caijie@whu.edu.cn](mailto:caijie@whu.edu.cn)

Phone: +86-27-6878-9321

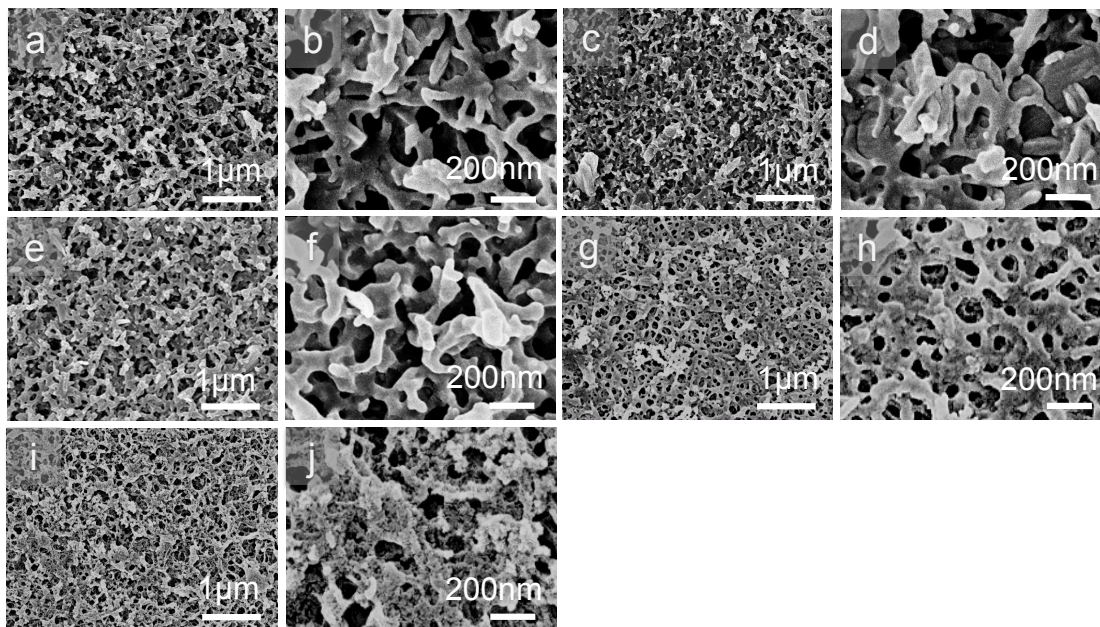

**Figure. S1** SEM images of surface of hydrophobic NCG-g-PGMA nanocomposites of S5 (a, b), S6 (c, d), S3 (e, f), S7 (g, h) and S8 (i, j) at low- and high-magnification.
